# Supplementary material
Source: PubMed Central journal article supplement (PMC6245659)
Supplement: NIHMS969016-supplement-PDF.pdf [file NIHMS969016-supplement-PDF.pdf]

SUPPLEMENTAL MATERIAL

SUPPLEMENTARY TABLE

Table. Type of Staff Interviewed at Study Hospitals

| Type of Staff                                                                                                                 | Interviews, <i>n</i> | Top<br>(Sites 1,2) | Non-Top   |
|-------------------------------------------------------------------------------------------------------------------------------|----------------------|--------------------|-----------|
| <b>Physicians (Non-Administration)</b>                                                                                        |                      |                    |           |
| Critical Care and Emergency Medicine Physician                                                                                | 9                    | 5 (2,1)            | 4         |
| Anesthesiologist                                                                                                              | 3                    | 2 (1,0)            | 1         |
| Hospitalist and other                                                                                                         | 9                    | 6 (1,0)            | 3         |
| Resident Physician                                                                                                            | 6                    | 2 (0,1)            | 4         |
| <b>Nurses (Non-Administration)</b>                                                                                            |                      |                    |           |
| Nurse Manager                                                                                                                 | 11                   | 7 (1,4)            | 4         |
| Nurse Practitioner/Clinical Nurse Specialist/CRNA                                                                             | 4                    | 3 (2,1)            | 1         |
| Nurse Educator                                                                                                                | 12                   | 7 (1,1)            | 5         |
| Nurse Code Team Member or ED/Critical Care Nurse                                                                              | 35                   | 27 (6,4)           | 8         |
| Emergency Department/Intensive Care Unit/Coronary Care Unit Director/Supervisor                                               | 10                   | 5 (0,0)            | 5         |
| <b>Other Staff (Non-Administration)</b>                                                                                       |                      |                    |           |
| Pharmacy                                                                                                                      | 8                    | 4 (1,1)            | 4         |
| RT Code Team Member                                                                                                           | 9                    | 7 (3,2)            | 2         |
| Other (IV/Lab Code Team Member, EKG, Biomedical Services, Chaplain, Security)                                                 | 10                   | 10 (1,4)           | 0         |
| <b>Administration</b>                                                                                                         |                      |                    |           |
| Senior Leadership (President, Vice-President, Chief Medical and Nursing Officers)                                             | 9                    | 8 (3,1)            | 1         |
| Director of Service Lines (e.g., Critical Care, Emergency Medicine, Anesthesia, Cardiac Catheterization Laboratory, Pharmacy) | 9                    | 6 (0,1)            | 3         |
| Quality and Data Management Team                                                                                              | 9                    | 6 (1,1)            | 3         |
| Other (Department Administrator, ACLS Trainer)                                                                                | 5                    | 1 (1,0)            | 4         |
| <b>Total</b>                                                                                                                  | <b>158</b>           | <b>106</b>         | <b>52</b> |

RT = Respiratory Therapist; CRNA = Certified Registered Nurse Anesthetist;  
 ACLS = Advanced Cardiac Life Support; ED = Emergency Department
